# Supplementary material for: Respiratory Syncytial Virus Infection Induces Chromatin Remodeling to Activate Growth Factor and Extracellular Matrix Secretion Pathways
Source: MDPI journal article supplement (doi:10.3390/v12080804), 2020-07-26

Supplemental Table S1. Mapped reads for ATAC-Seq dataset

| Dataset | No. Reads  | No. Mapped | Percentage (%) |
|---------|------------|------------|----------------|
| WT_1    | 46,036,987 | 40,360,835 | 88             |
| WT_2    | 59,175,288 | 51,987,516 | 88             |
| RSV_1   | 58,691,358 | 51,326,986 | 87             |
| RSV_2   | 56,720,822 | 49,220,216 | 87             |

Supplemental Figure S1. Quality assessment of ATAC-Seq data. For each replicate, Fragment size and library complexity is plotted.

S1A. Fragment size, control sample, replicate 1

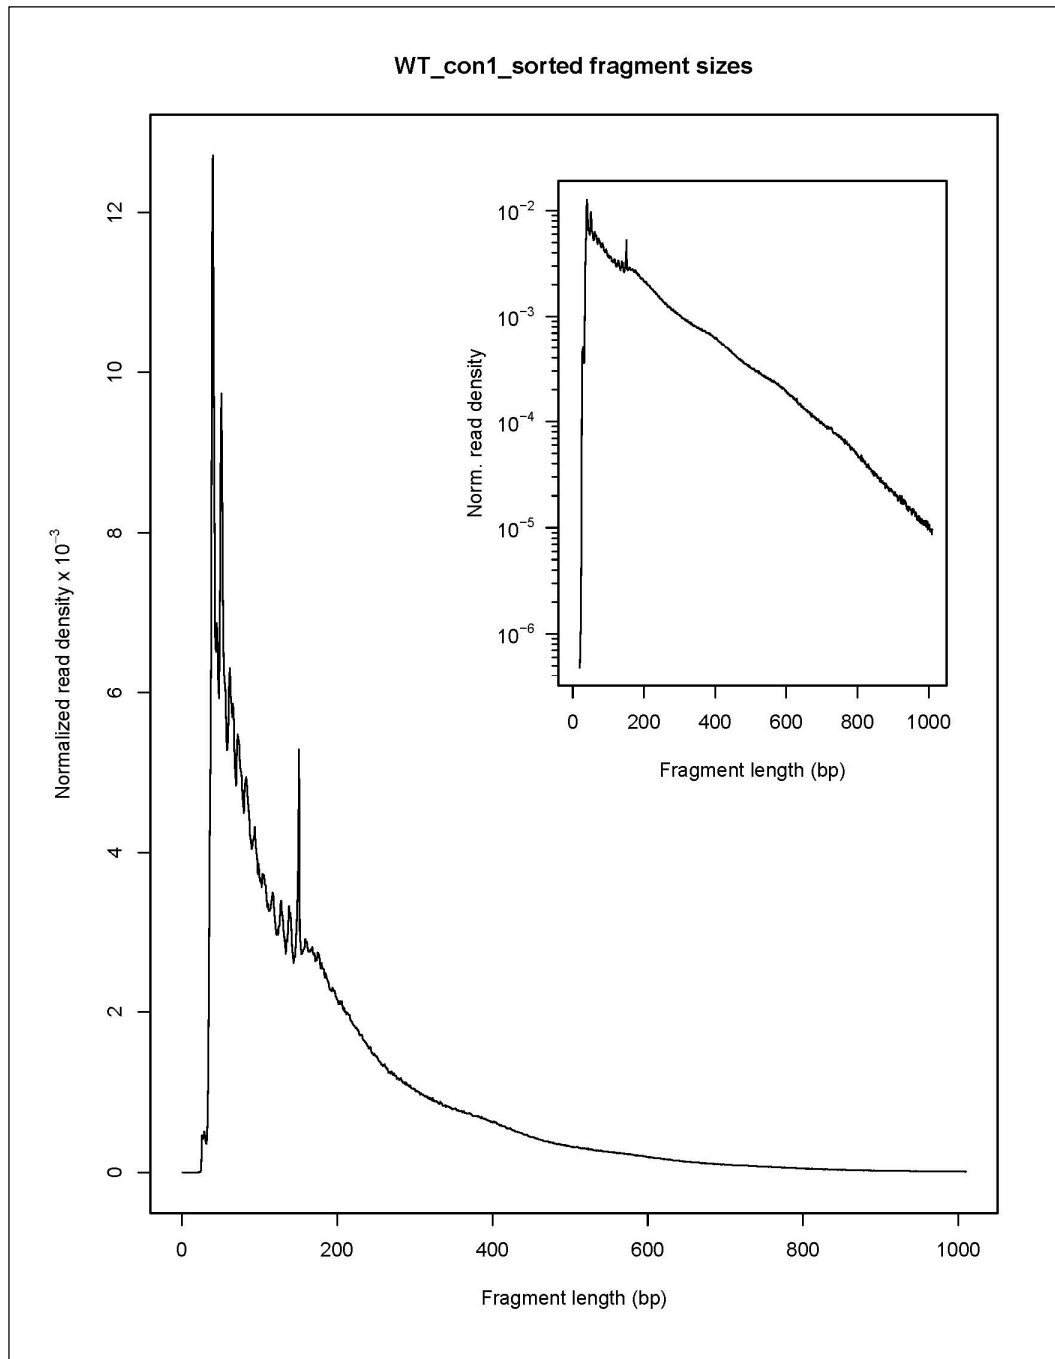

S1B. Library complexity, control sample, replicate 1

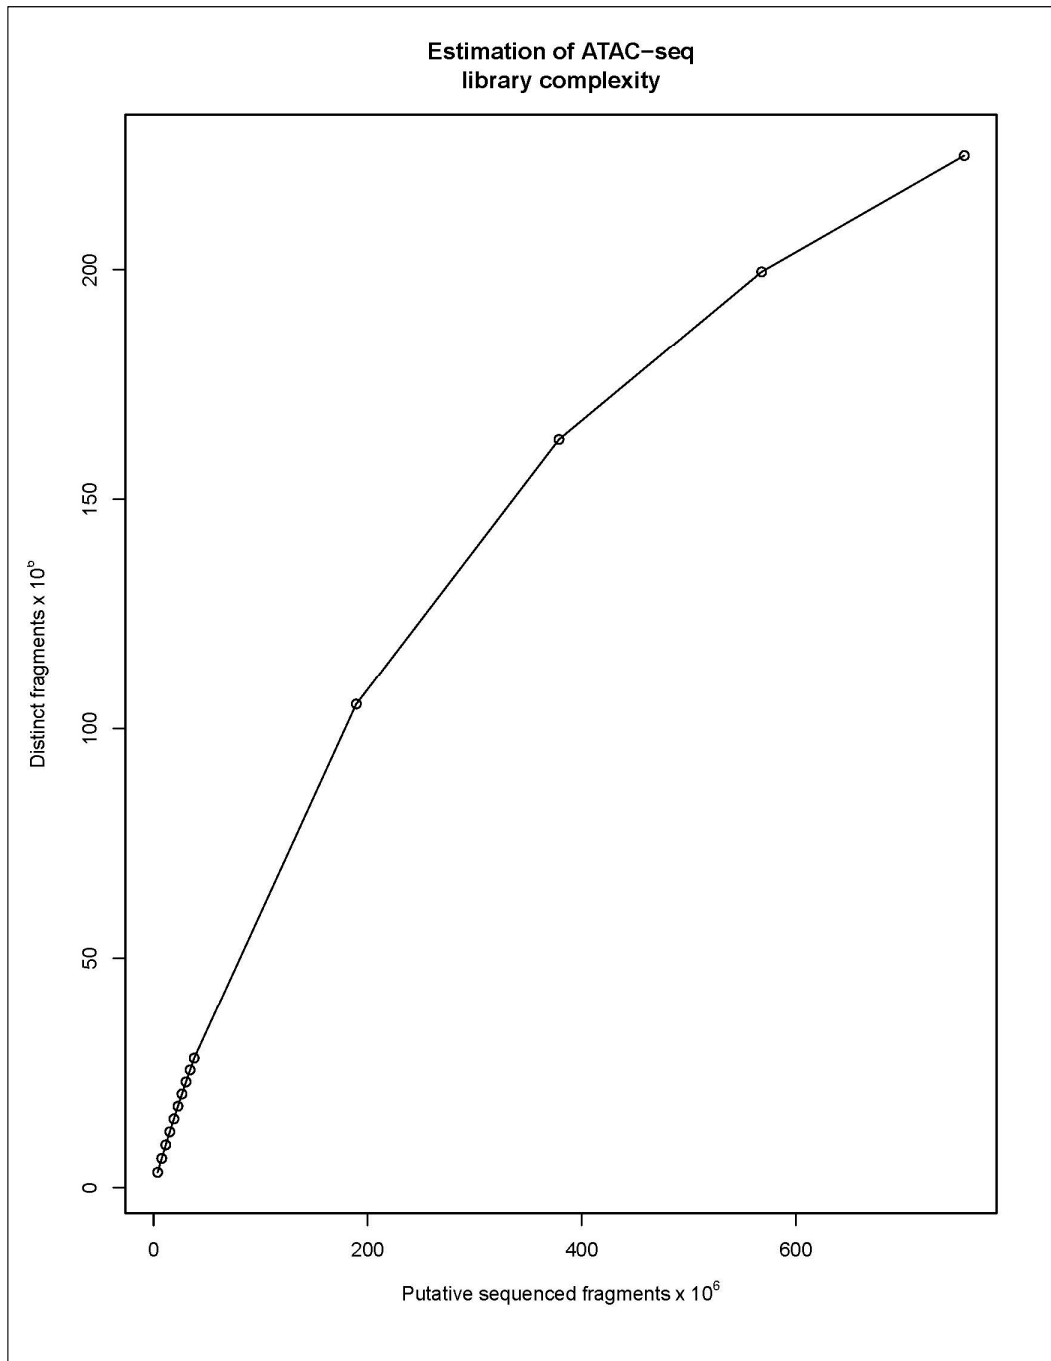

S1C. Fragment size, control sample, replicate 2

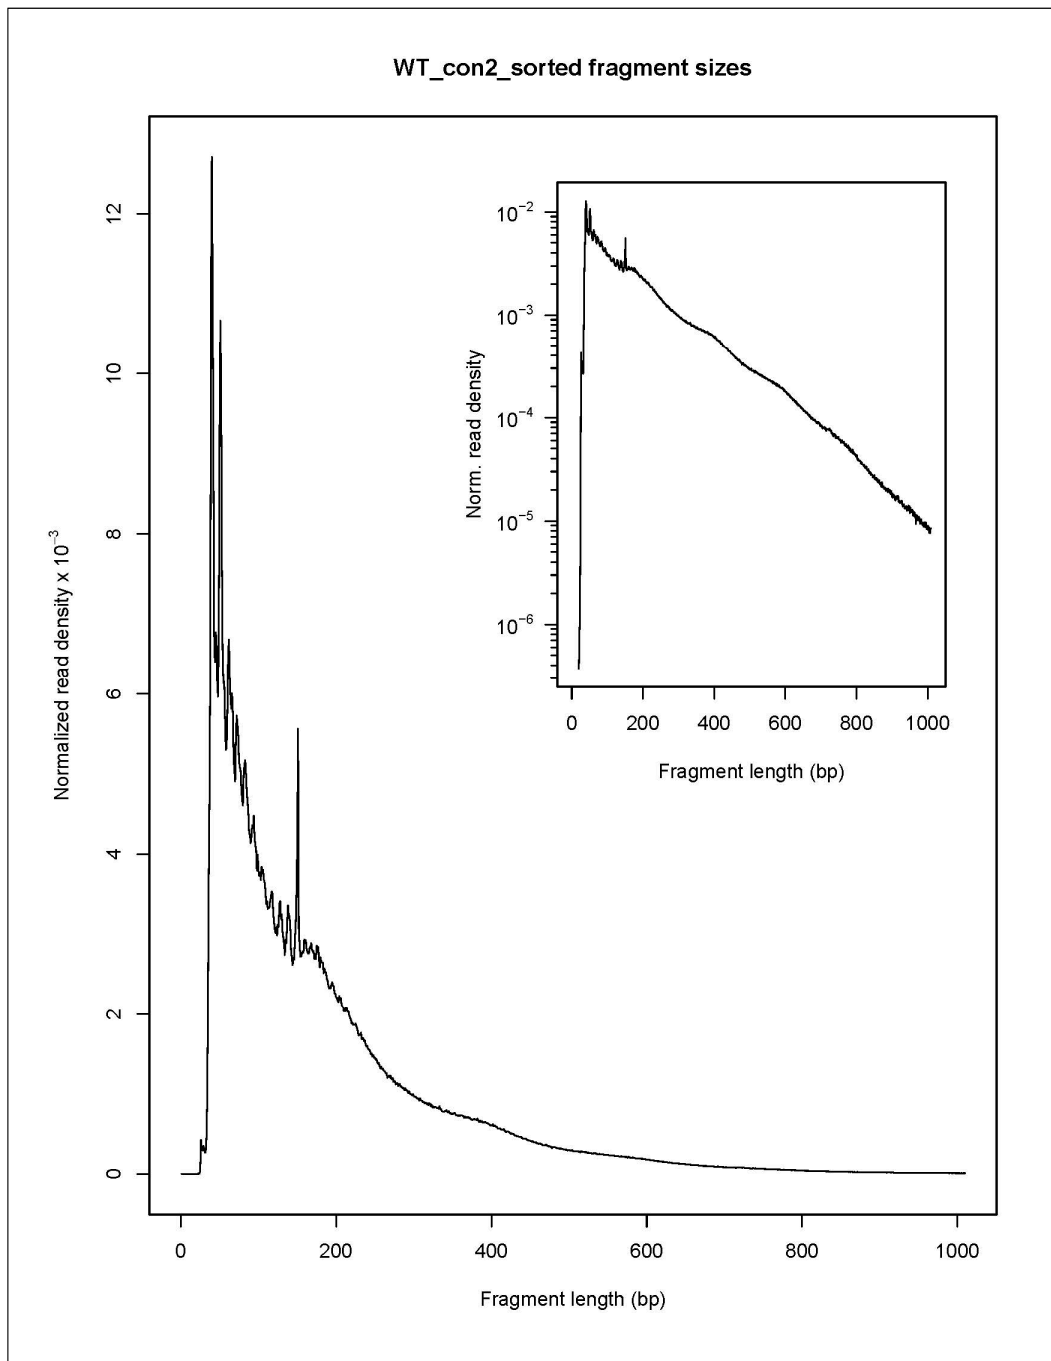

S1D. Library complexity, control sample, replicate 2

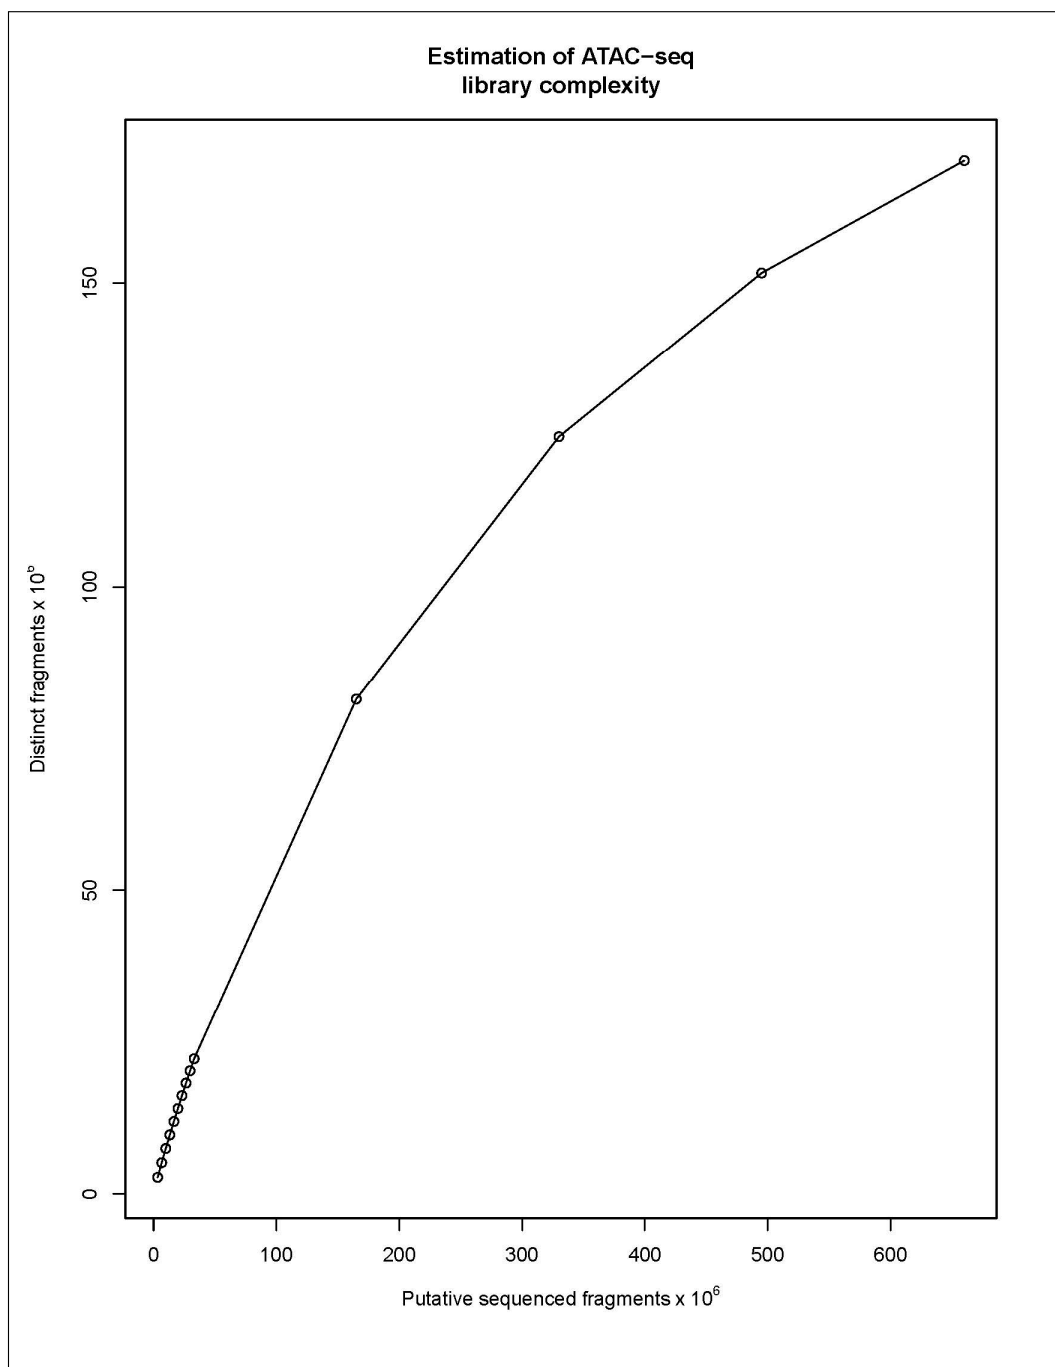

S1E. Fragment size, RSV infected, replicate 1

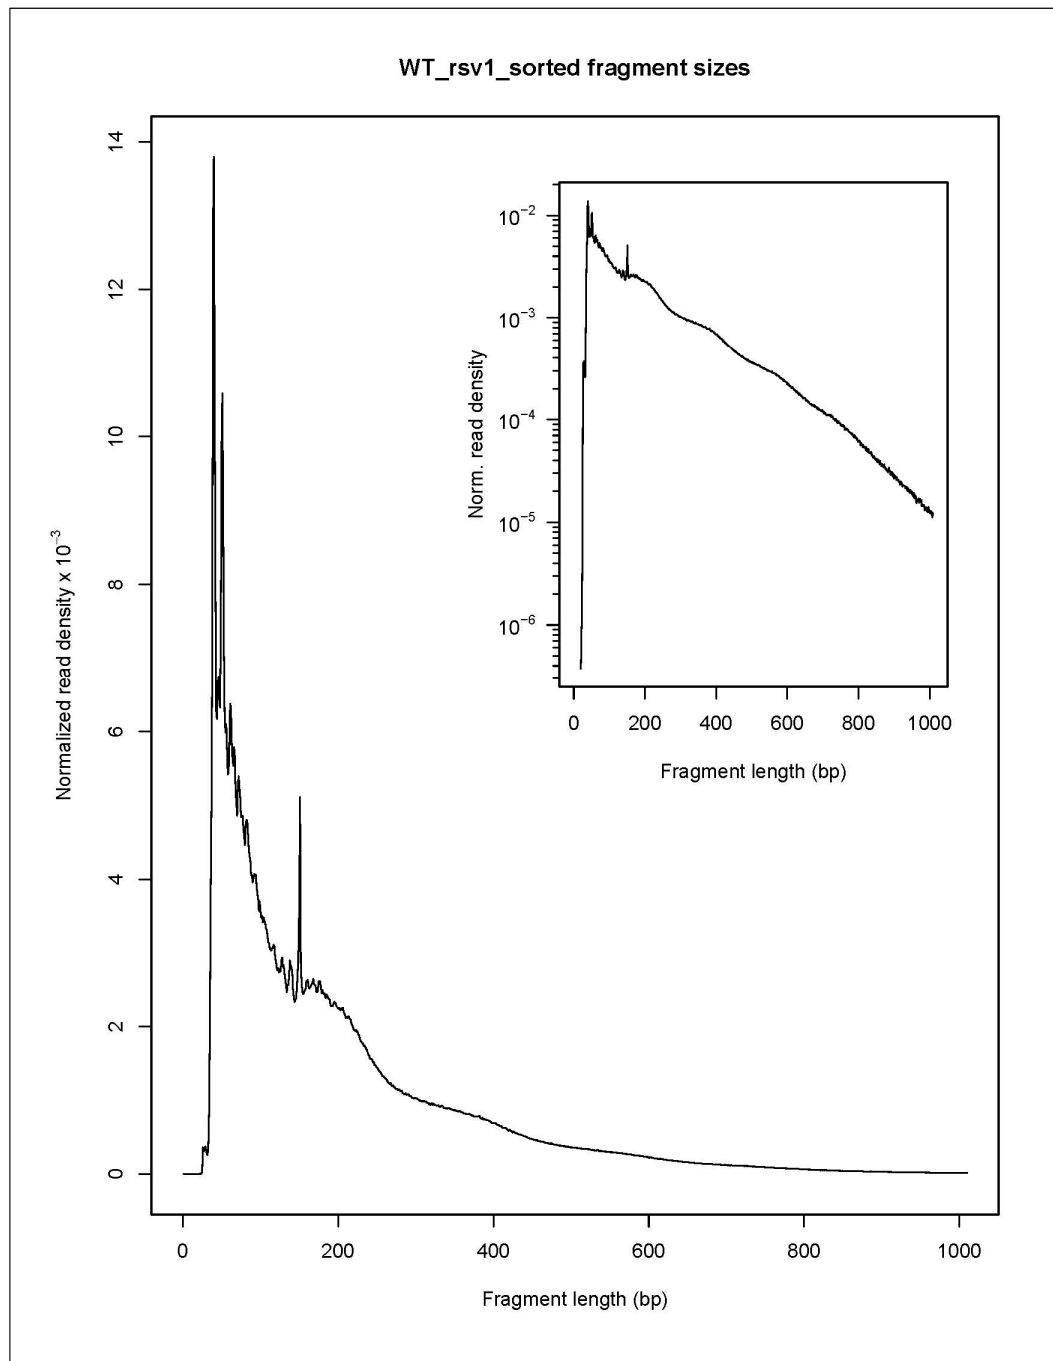

S1F. Library complexity, RSV sample, replicate 1

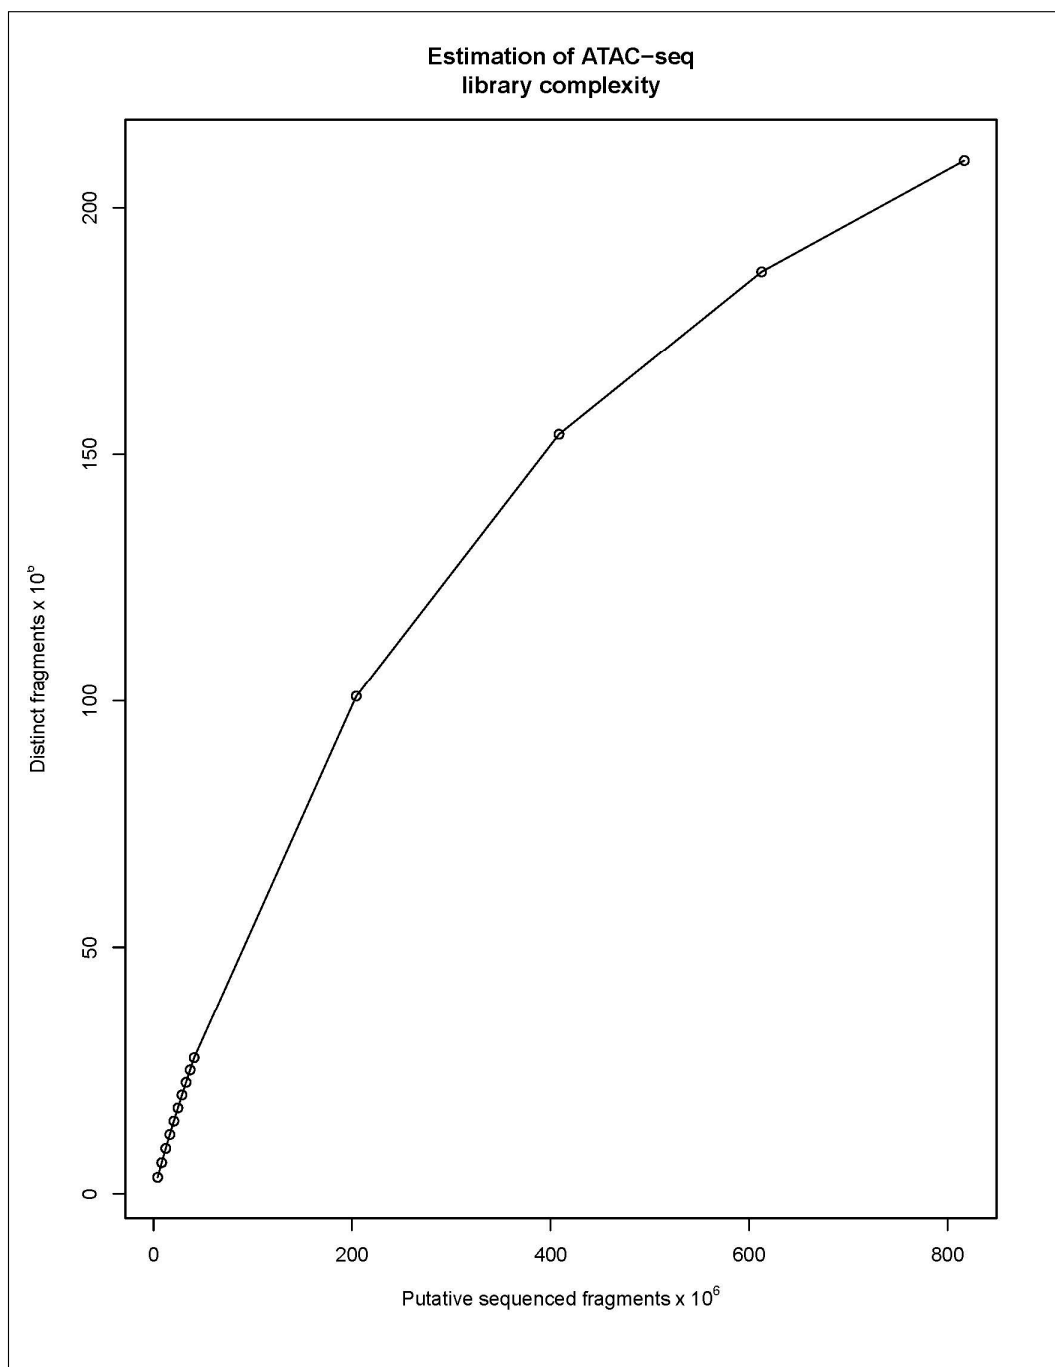

S1G. Fragment size, RSV sample, replicate 2

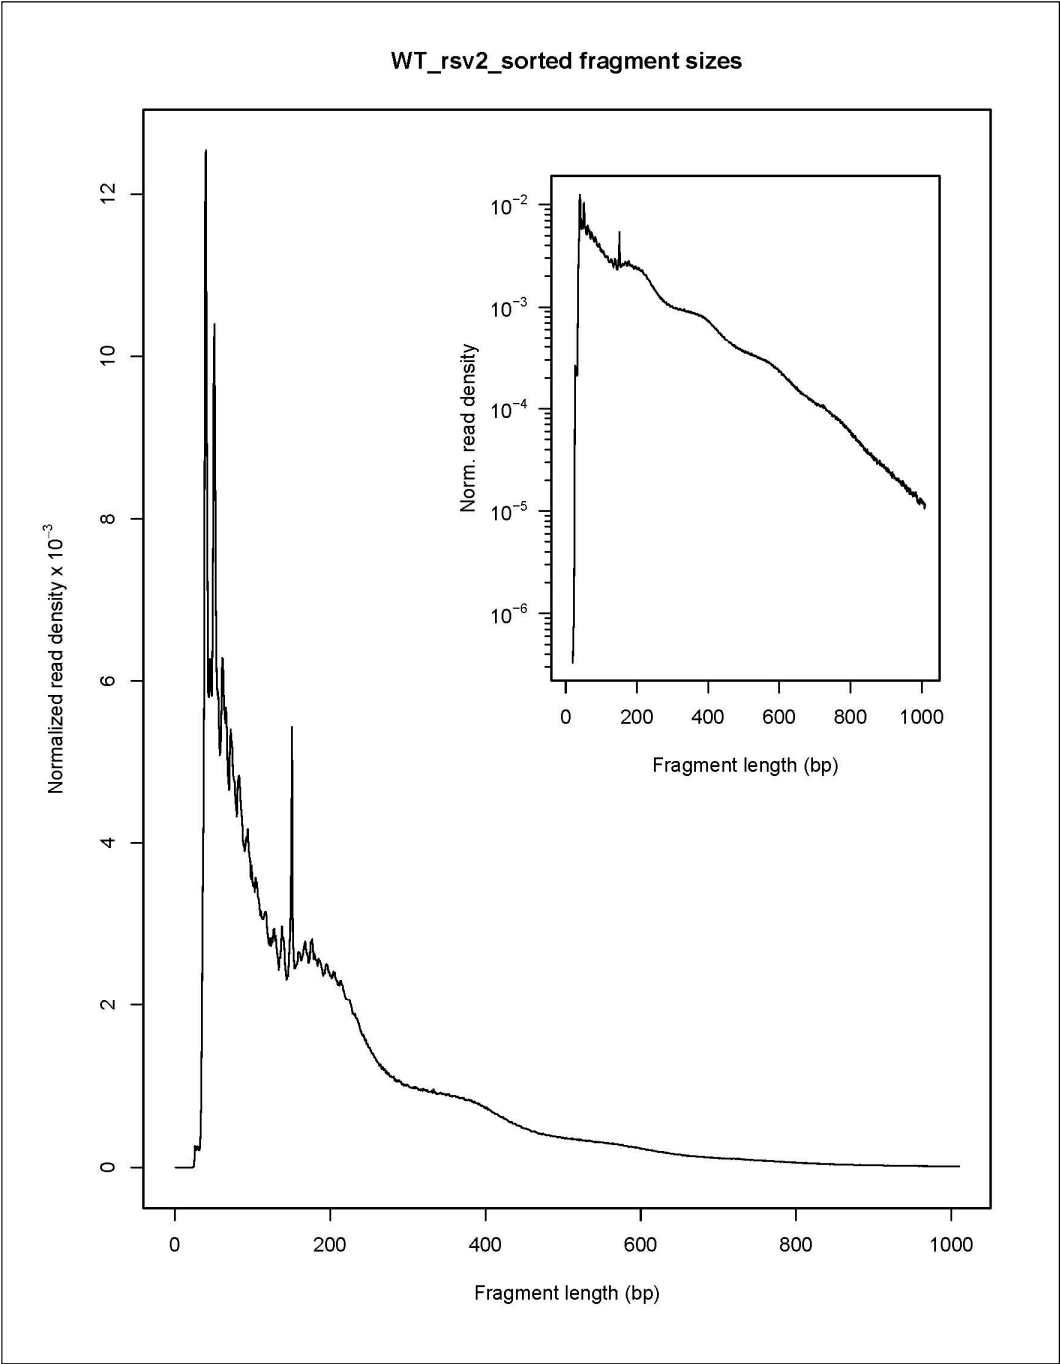



S1H. Library complexity, RSV sample, replicate 2

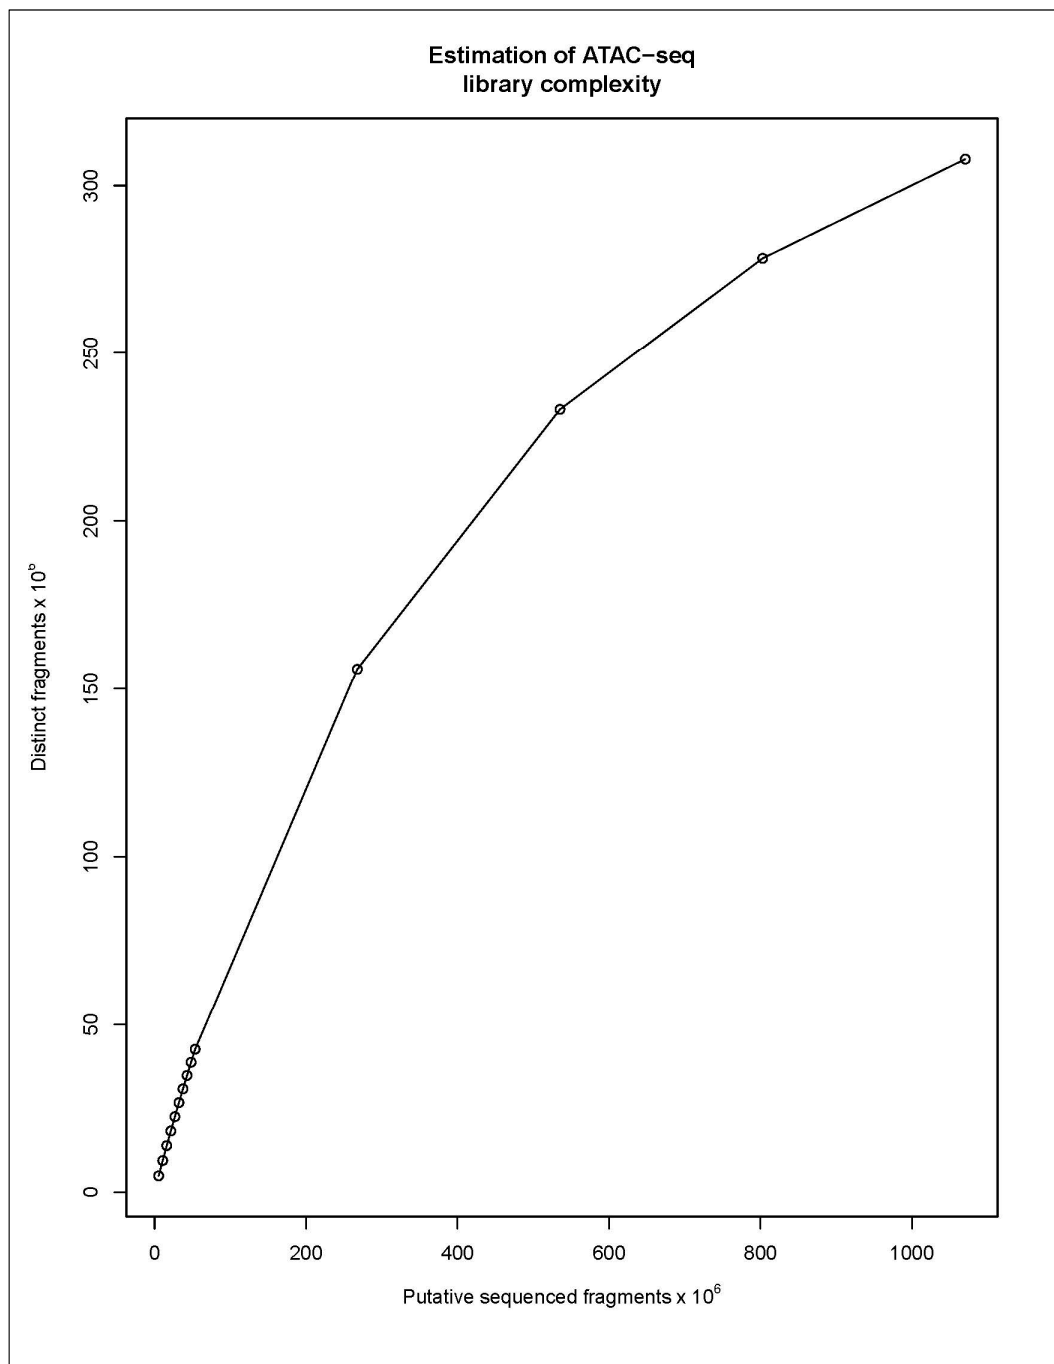

Supplemental Figure 2. Overlap of read calling algorithms for occupancy analysis. Shown are number of unique genes with ATAC-Seq peaks  $\pm 3$  kb of TSS identified in uninfected hSAECs.

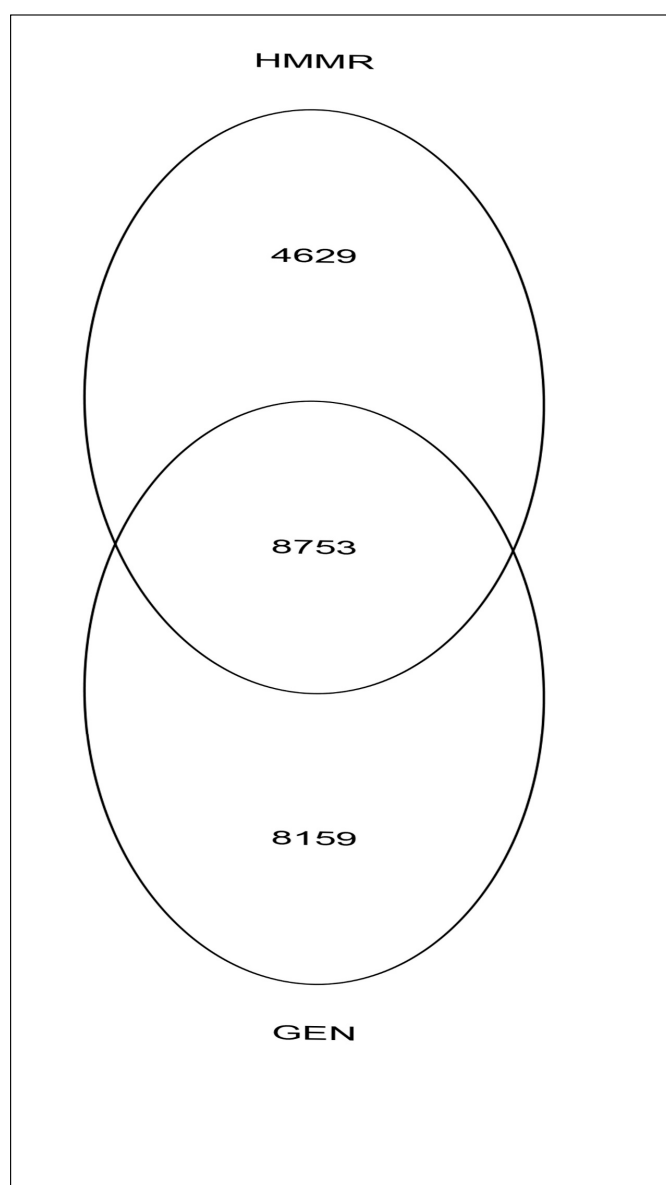

Supplemental Figure 3. Overlap of read calling algorithms for differential analysis. Shown are number of unique genes with ATAC-Seq peaks  $\pm 3$  kb of TSS identified in RSV-infected vs uninfected hSAECs.

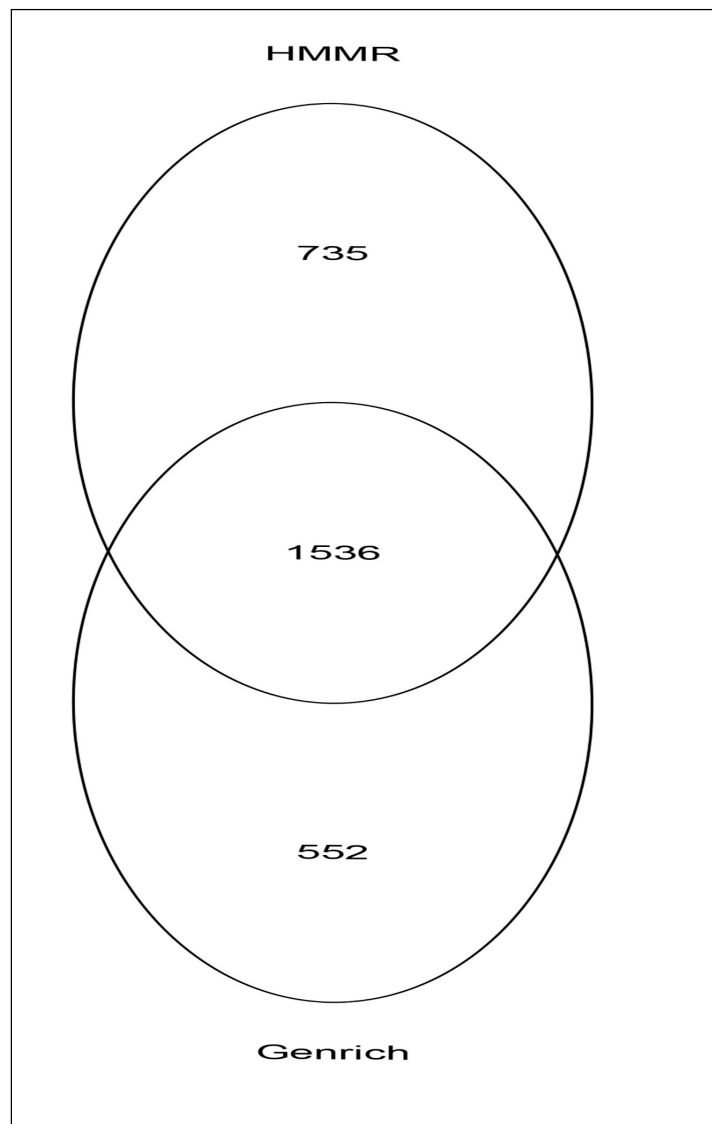

Supplement: s1 [file s1]
